# Supplementary material
Source: Springer Nature journal article supplement (https://www.springermedizin.de/resource/supplementary/12879_2013_2926_MOESM2_ESM.pdf/9445376)
Supplement: MOESM2 [file 9445376]

**UNIVERSITY OF MICHIGAN HOSPITALS & HEALTH CENTERS**  
**Functional Health Pattern Assessment: ADULT**  
 To be completed within 24 hours of hospital admission

DATE: \_\_\_\_\_ TIME: \_\_\_\_\_ AREA/UNIT: \_\_\_\_\_

Admitted from:  Home  E.R.  Clinic  Outside Hospital

Nursing Home  Other: \_\_\_\_\_

Accompanied by:  No One  Family/Friend

In case of emergency, notify:

|             |                     |                        |
|-------------|---------------------|------------------------|
| Name: _____ | Relationship: _____ | Phone number(s): _____ |
| Name: _____ | Relationship: _____ | Phone number(s): _____ |

Allergies:  none known  correct per PSL  yes: type/reaction  
 Latex

**HEALTH PERCEPTION / HEALTH MANAGEMENT**

**Help staff teach you about your health & care.**  
**Tell us about you, the patient**

**check all that apply**

**Issues that make it hard to learn:**

- Hearing
- Vision
- Memory / Forgetfulness
- Feelings (sadness, worry)
- Lack of resources (money, help at home)
- Pain, comfort
- Other:
- None

**When teaching me, consider my:**

- Usual meal, diet
- Finances, money
- Faith, religion
- Use of treatments such as massage or products such as vitamins, herbs
- Culture
- Other:
- None

**My interest in learning more about my health / care is:**

- High
- Medium
- Low

**I follow treatment / advice:**

- Always - mostly
- Sometimes
- Rarely/never

**I learn best by:**

- Seeing
- Doing
- Hearing
- Reading
- Other:

Your name: \_\_\_\_\_

- Patient  Family/other  Staff

**Reason for admission/visit:**

- What have you been doing for this?  nothing  other: \_\_\_\_\_
- Has it been effective/working/helping you?  yes  no  not sure
- What do you expect will be done during your hospital stay?  not sure  other: \_\_\_\_\_

Patient perception of general health:  excellent  very good  good  fair  poor: (Describe) \_\_\_\_\_

How soon do you expect to go home/leave the hospital?  \_\_\_\_\_ days/week  doesn't know  NA

Significant health history (diseases/surgeries and management of current diseases):  none  unknown  see Admitting H & P per MD/NP/PA

# UNIVERSITY OF MICHIGAN HOSPITALS & HEALTH CENTERS Functional Health Pattern Assessment: ADULT

To be completed within 24 hours of hospital admission

## ADULT FHPA: MEDICATIONS: see Admitting H & P per MD/NP/PA for current medications

- Have you taken any medications in the last 24 hours (including patches and herbal and topical medications)?  No  Yes
- If yes, What were they? \_\_\_\_\_

### Substance use:

- Tobacco  Current smoker  Former smoker: quit \_\_\_\_\_  Never smoked
- Alcohol  No  Yes  Type/quantity: \_\_\_\_\_  Last used: \_\_\_\_\_
- Street Drugs/Other  No  Yes  Type/quantity: \_\_\_\_\_  Last used: \_\_\_\_\_

Recent exposure to communicable diseases (such as chicken pox, TB, etc., within last 30 days)?  yes  no  Unknown

Immunization status: up to date?

- Tetanus  Yes Date \_\_\_\_\_  No  Unknown

SEE VACCINE ASSESSMENT

## COGNITIVE / PERCEPTUAL (NEUROLOGICAL)

### Senses:

- Hearing:  no known deficits  deficit  Compensation: describe \_\_\_\_\_
- Vision:  no known deficits  deficit  Compensation: describe \_\_\_\_\_
- Speech:  no known deficits  deficit  Compensation: describe \_\_\_\_\_

### LOC

see 24 hour flowsheet

- alert
- responds only to deep stimulation - since \_\_\_\_\_  unknown
- slow to arouse - since \_\_\_\_\_  unknown
- unresponsive - since \_\_\_\_\_  unknown

### Pain/Discomfort:

- Pain at present  None  yes (see 24 hour flowsheet)
- Pain in recent past  None  yes \_\_\_\_\_

Cognition - oriented to  person  place  time  situation

- No apparent difficulties  NA  \*Long term memory deficit\*  Unable to respond appropriately
- \*Short term memory deficit\*  \*Unable to follow commands\*
- Able to follow simple commands only

*might contribute to decreased functional capacity - Consult with physician regarding referral for focused functional assessment*

## NUTRITION / METABOLIC

Height: \_\_\_\_\_ Weight: \_\_\_\_\_ lbs/kg  see 24 hour flowsheet

Diet PTA:  General  Low fat/cholesterol  Carb controlled  Salt restricted  Weight loss  Other: \_\_\_\_\_

Recent unintentional weight gain (how much? \_\_\_\_\_ lbs. over \_\_\_\_\_ weeks/months)

- Diabetes:  No  Yes - 1st dx at age \_\_\_\_\_ Mgmt:  Diet & activity  Insulin injections/pump  Oral agents
- Hypo/hyperglycemia (frequency/symptoms/treatment): \_\_\_\_\_
- Home glucose Monitoring?  No  Yes - frequency: \_\_\_\_\_ ; Usual range: \_\_\_\_\_  uses to adjust insulin;
- Past Diabetes Education?  No  Yes  Unknown
- Problems: \_\_\_\_\_

If any of the following are marked yes, process RD referral in CareLink within 24 hours of admission:

- Have you recently lost  $\geq 10$  lb. without trying?  Yes  No  Unknown
- Do you currently have a feeding tube that is not in use?  Yes  No  Unknown
- Any pressure ulcers, non-healing wounds, burns, or GI fistula present?  Yes  No  Unknown
- Are you pregnant or lactating?  Yes  No  Unknown  N/A

**UNIVERSITY OF MICHIGAN HOSPITALS & HEALTH CENTERS**  
**Functional Health Pattern Assessment: ADULT**

To be completed within 24 hours of hospital admission

**ELIMINATION**

**Urinary History/Pattern:**

- No problems
- Pain
- Blood
- Loss of control/leakage
- Difficulty starting
- Special Management:
- Other:

- Frequency
- Urgency
- Nocturia
- Ostomy/Tube

**Bowel History/Pattern:**

- No problems
- Diarrhea
- Constipation
- Loss of control
- Special Management:
- Other:

- Bleeding
- Hemorrhoids
- Ostomy/Tube

**Pattern:**

**Last Bowel Movement:**

**ACTIVITY / EXERCISE (CARDIOVASCULAR / RESPIRATORY / MUSCULOSKELETAL) - KATZ SCALE**

Do you presently have any difficulties with daily activities?  No  Yes (Describe):

Management of any activities that interfere with ADLs:

Any Falls within last 6 mos.?  No  Yes (Describe):

**Key for scoring ADL activities:**

- Level 0: full self-care
- Level 1: needs equipment or device
- Level 2: needs assistance or supervision of another person
- Level 3: needs assistance or supervision of another person & equipment
- Level 4: dependent and does not participate

**ADL activities: (\* for 1 - 4)**

|               |   |   |   |   |   |
|---------------|---|---|---|---|---|
| Feeding:      | 0 | 1 | 2 | 3 | 4 |
| Bathing:      | 0 | 1 | 2 | 3 | 4 |
| Toileting:    | 0 | 1 | 2 | 3 | 4 |
| Bed mobility: | 0 | 1 | 2 | 3 | 4 |
| Ambulating:   | 0 | 1 | 2 | 3 | 4 |
| Dressing:     | 0 | 1 | 2 | 3 | 4 |

*Consult with Physician regarding referral for focused functional assessment*

**SLEEP / REST**

Sleep quantity/quality sufficient for desired/required activities?  Yes  No, (Describe):

Pattern of sleep: Use of aids:  No  Yes, (Describe):

**ROLE / RELATIONSHIP**

**Occupation:**

Resources at home (to help patient after discharge):

- Marital status M S W D Sep How long?
- Household members:
- Living arrangements:  NA/unknown  home  apartment  
 assisted living  nursing facility  
 Description (e.g. stairs/accessibility):  
 no access issues

Financial concerns:  No  Yes

Anticipated continuing care needs after this visit:  None  NA

- Home care services
- Extended care facility
- equipment/supplies
- IV/infusion therapy
- other:

**ABUSE/NEGLECT - INTERVIEW PRIVATELY**

**If unable to ask the following 4 questions, must indicate reason:**

1. Are you afraid of anyone close to you?  No  Yes - whom?
2. Have you ever been hit, slapped, kicked, pushed, shoved or otherwise physically hurt by your partner or someone close to you?  
 No  Yes - date of last episode?
3. Are you frequently upset, ashamed or embarrassed by someone close to you?  No  Yes - whom?
4. Has anyone forced you to have sexual activities?  
 No  Yes - date of last episode?

**If yes to any abuse/neglect questions, refer to: Abuse Consultation Team or Social Work**

**SEXUALITY / REPRODUCTIVE**

Any sexual issues you want to address during this visit?  No  Yes (Describe):

Are you sexually active?  NA  No  Yes

Are you using safe sex practices?  NA  No  Yes (Describe):

Last menstrual period:  Don't know  NA Pregnant?  No  Yes  Don't know
